# Supplementary material for: A Case-Control Study to Identify Risk Factors Associated with Avian Influenza Subtype H9N2 on Commercial Poultry Farms in Pakistan
Source: PubMed Central journal article supplement (PMC4361405; doi:10.1371/journal.pone.0119019), 2015-03-16
Supplement: pone.0119019.s002.pdf [file pone.0119019.s002.pdf]

## Technical Appendix S1

### Questionnaire for the case-control study to identify risk factors associated with avian influenza subtype H9N2 on commercial poultry farms in Pakistan

- This section must be filled in before completing the questionnaire:

|                                     |                    |
|-------------------------------------|--------------------|
| Date:                               | Questionnaire No.: |
| District:                           | Farm Code:         |
| Land Area / Farm Area (Sq. meter) : |                    |

- Tick only one answer:

#### SECTION 1 ( LOCATION OF FARM )

---

|           |            |
|-----------|------------|
| Latitude: | Longitude: |
|-----------|------------|

1. Distance of the farm from main road:..... \_\_\_\_\_ (km)
2. Distance of farm from nearest commercial poultry farm:..... \_\_\_\_\_ (km)
3. Distance from nearest case (infected) farm: ..... \_\_\_\_\_ (km)
4. Is this a rice/wheat growing area? ..... **Yes**  **No**

#### SECTION 2 ( BIOSECURITY )

- 
5. Is there a pond (s)/water reservoir inside/near your farm? ..... **Yes**  **No**
  6. If yes, do you see any wild/migratory birds come to the pond(s)/reservoir?  
..... **Yes**  **No**
  7. Can wild birds enter into the shed? ..... **Yes**  **No**
  8. Is the farm fully fenced to prevent entry of wild animals? ..... **Yes**  **No**
  9. Do you disinfect the area around sheds? ..... **Yes**  **No**

10. If yes, how often do you disinfect the area around sheds?  
 ..... **regularly**  **not regularly**
11. Do you wash and disinfect the cages before re-introduction into the farm?  
 ..... **Yes**  **No**
12. Do you share the farm equipment with other farms? ..... **Yes**  **No**
13. Do the workers change rubber boots or soak them in foot bath before entering the bird area? ..... **Yes**  **No**
14. Do the workers change cloths or spray disinfectant on them before entering the bird area? ..... **Yes**  **No**
15. Do visitors change rubber boots or soak them in foot bath before entering the bird area? ..... **Yes**  **No**
16. Do you have foot bath/dipping area at the entrance of farm? ..... **Yes**  **No**

**SECTION 3 ( FLOCK HISTORY )**

---

17. What was the mortality (%) on your farms? ..... \_\_\_\_\_
18. Do you vaccinate your birds against H9N2 AIV strain? ..... **Yes**  **No**
19. Age of flock: ..... \_\_\_\_\_ (days)
20. Capacity of farm: ..... \_\_\_\_\_ (no. of birds)
21. Was the flock affected by infectious bursal disease? ..... **Yes**  **No**
22. Was the flock affected by E. Coli infection? ..... **Yes**  **No**

**SECTION 4 ( FARM MANAGEMENT )**

---

23. Do you raise backyard poultry/pet birds at your farm? ..... **Yes**  **No**
24. Do you see rodents in the sheds? ..... **Yes**  **No**
25. Can truck/large vehicle enter the farm? ..... **Yes**  **No**
26. Do you sell your birds/eggs directly to retail shop? ..... **Yes**  **No**
27. Do you sell culled birds directly to retail shop? ..... **Yes**  **No**
28. Do you store water? ..... **Yes**  **No**
29. If yes, do you have cover for your water tank(s)? ..... **Yes**  **No**

30. How do you dispose waste from shed after cleaning?.....  
 ..... **properly disposed of**  **not properly disposed of**
31. How do you dispose of the dead birds?.....  
 ..... **properly disposed of**  **not properly disposed of**
32. Which type of sheds do you have.....**windowless**  **open**  **semi- windowless**
33. What kind of ventilation system is used on your farm? .....  
 ..... **fan ventilation**  **natural**
34. How does your flock get their drinking water? ..... **automatic**  **manual**
35. How does your flock get their feed? ..... **automatic**  **manual**
36. What kind of floor cover is in the sheds? ..... **concrete**  **saw dust**
37. Egg/bird catching collection system: ..... **automatic**  **manual**
